# Supplementary material for: Semi-hydrogenation of alkynes to alkenes over Pd nanoparticles embedded in Mo2C prepared from a high-temperature pulse
Source: Royal Society of Chemistry journal article supplement (doi:10.1039/d4cc04498c), 2024-01-01
Supplement: d4cc04498c1.pdf [file d4cc04498c1.pdf]

## Supplementary Information

# **Semi-hydrogenation of Alkynes to Alkenes over Pd Nanoparticles Embedded in Mo<sub>2</sub>C Prepared from High- Temperature Pulse**

Chang Zhou,<sup>a,†</sup> Haitao Han,<sup>a,†</sup> Jian Zhang,<sup>\*a</sup> Xiaoxue Mu,<sup>a</sup> Jianbin Huang,<sup>a</sup>  
Dongquan Lin,<sup>a</sup> and Feng-Shou Xiao<sup>\*a,b</sup>

<sup>a</sup>. Beijing Advanced Innovation Center for Soft Matter, Science and Engineering, Beijing University of Chemical Technology, Beijing 100029, China. Email: jianzhangbuct@buct.edu.cn (J. Zhang)

<sup>b</sup>. Key Lab of Biomass Chemical Engineering of Ministry of Education, College of Chemical and Biological Engineering, Zhejiang University, Hangzhou 310027, China. E-mail: fsxiao@zju.edu.cn (F.-S. Xiao)

## EXPERIMENTAL SECTION

### Catalyst preparation

$\text{Pd}(\text{NH}_3)_4(\text{NO}_3)_2$  (AR),  $\beta\text{-Mo}_2\text{C}$  (99%),  $\gamma\text{-Al}_2\text{O}_3$  (99%), commercial Pd/C catalyst (5.5 wt% Pd, designated as Pd/C-commercial), 3-butyn-1-ol (AR), 3-buten-1-ol (AR), 3-butyn-2-ol (AR), 3-buten-2-ol (AR), but-2-yne-1,4-diol (AR), but-2-ene-1,4-diol (AR), 2-methylbut-3-yn-2-ol (AR), 2-methylbut-3-en-2-ol (AR), phenylacetylene (AR), styrene (AR), 4-bromophenylacetylene (AR), and 4-bromostyrene (AR) were purchased from Aladdin chemical Co., Ltd. Activated carbon (AR) and ethanol (AR) were bought from Sinopharm Chemical Co., Ltd. Commercial Pd/ $\text{Al}_2\text{O}_3$  catalyst (5 wt% Pd, designated as Pd/ $\text{Al}_2\text{O}_3$ -commercial) was purchased from Bidepharm Co., Ltd.

**Synthesis of Pd/ $\text{Mo}_2\text{C}$ -HT and Pd/C-HT catalysts.** The synthesis of Pd/C-HT and Pd/ $\text{Mo}_2\text{C}$ -HT catalysts were treating the  $\text{Pd}(\text{NH}_3)_4(\text{NO}_3)_2$ -containing  $\text{Mo}_2\text{C}$ -HT or activated carbon through high-temperature pulse method. Typically,  $\text{Mo}_2\text{C}$ -HT or activated carbon was mixed with a desired amount of  $\text{Pd}(\text{NH}_3)_4(\text{NO}_3)_2$  solution and aged at room temperature overnight.  $\text{H}_2\text{O}$  was evaporated by grinding the above mixture at 60 °C. The obtained solid was then treated at 1800 °C (0.4 S × 10 times) in  $\text{N}_2$  atmosphere by high-temperature pulse to obtain the Pd/C-HT or Pd/ $\text{Mo}_2\text{C}$ -HT catalyst. The Pd loading amount in the Pd/C-HT and Pd/ $\text{Mo}_2\text{C}$ -HT catalysts were determined to be 0.10 wt% and 0.08 wt%.

**Synthesis of  $\text{Mo}_2\text{C}$ -HT.** Typically, 0.1 g of commercially available  $\beta\text{-Mo}_2\text{C}$  powder (Aladdin chemical Co., Ltd, 99%) was put into a high temperature oven (Jilin Padike Precision Instruments Co., Ltd.), followed by purging with  $\text{N}_2$  for 3 times to remove the air in the oven. Then, the  $\text{Mo}_2\text{C}$ -HT catalyst was obtained by treating the  $\beta\text{-Mo}_2\text{C}$  powder at 1800 °C in  $\text{N}_2$  atmosphere by high-temperature pulse (0.4 s/time × 10 times).

**Synthesis of Pd/ $\text{Al}_2\text{O}_3$ -HT and Pt/ $\text{Mo}_2\text{C}$ -HT catalysts.** The synthesis method of Pd/ $\text{Al}_2\text{O}_3$ -HT and Pt/ $\text{Mo}_2\text{C}$ -HT were the same as that of Pd/ $\text{Mo}_2\text{C}$ -HT, expect that  $\gamma\text{-Al}_2\text{O}_3$  was used as the carrier and  $\text{Pt}(\text{NH}_3)_4(\text{NO}_3)_2$  was used as the precursor.

**Catalytic hydrogenation of alkynes.** The catalytic hydrogenations of 3-butyn-1-ol, 3-butyn-2-ol, but-2-yne-1,4-diol, 2-methylbut-3-yn-2-ol, phenylacetylene, and 4-

bromophenylacetylene were performed on an autoclave equipped with a magnetic stirrer and a heating jacket. Typically, the reaction substrate was mixed with ethanol and catalyst in the autoclave. The autoclave was purged with 3 MPa of H<sub>2</sub> for 5 times and charged with 1 MPa of H<sub>2</sub>. Afterwards, the autoclave was heated in the heating jacket for desired reaction time. The detailed feeding amounts, reaction temperature, and time are as following: 1.75 g of 3-butyn-1-ol, 100 mg of catalyst, 30 g of ethanol, 40 °C, 1 MPa of H<sub>2</sub>, and 60 min; 1.75 g of 3-butyn-2-ol, 100 mg of catalyst, 30 g of ethanol, 40 °C, 1 MPa of H<sub>2</sub>, and 20 min; 2.00 g of but-2-yne-1,4-diol, 85 mg of catalyst, 30 g of ethanol, 50 °C, 1 MPa of H<sub>2</sub>, and 90 min; 2.05 g of 2-methylbut-3-yn-2-ol, 85 mg of catalyst, 30 g of ethanol, 30 °C, 1 MPa of H<sub>2</sub>, and 8 min; 10.00 g of phenylacetylene, 200 mg of catalyst, 30 g of ethanol, 50 °C, 3 MPa of H<sub>2</sub>, and 22 min; 2.26 g of 4-bromophenylacetylene, 100 mg of catalyst, 30 g of ethanol, 50 °C, 1 MPa of H<sub>2</sub>, and 72 min. After reaction, the catalyst was separated by centrifugation and the products were analyzed on a gas chromatography equipped a flame-ionization detector (FID). The alkyne conversion and alkene selectivity are calculated as following:

$$\text{alkyne conversion} = \frac{n_{\text{alkyne,converted}}}{n_{\text{alkyne},0}} \times 100\% \quad (1)$$

$$\text{alkene yield} = \frac{n_{\text{alkene,produced}}}{n_{\text{alkyne},0}} \times 100\% \quad (2)$$

$$\text{alkene selectivity} = \frac{n_{\text{alkene,produced}}}{n_{\text{alkyne,converted}}} \times 100\% \quad (3)$$

where  $n_{\text{alkyne},0}$ ,  $n_{\text{alkyne,converted}}$ , and  $n_{\text{alkene,produced}}$  stand for the feeding alkyne, the converted alkyne, and the produced alkene during the reaction. To test the activity of catalyst, we measured turnover frequency (TOF) values at low conversion (<10 %) based on the equation in the following:

$$\text{Turnover frequency (TOF}_i\text{)} = \frac{n_{\text{alkyne,converted}}}{n_{\text{Pd}} \times \text{reaction time}} \quad (4)$$

Catalytic hydrogenation of acetylene was performed on a fixed bed reactor with an inner diameter of 10 mm. Typically, 300 mg of catalyst (40-60 mesh) was diluted with the same volume of quartz. The catalysts were pretreated at 200 °C in flowing H<sub>2</sub> (30 mL/min) before tests and cooled to the reaction temperature. Then, the reaction gas with a composition of 1% C<sub>2</sub>H<sub>2</sub> / 20% C<sub>2</sub>H<sub>4</sub> / 20% H<sub>2</sub> / 59% N<sub>2</sub> (60 mL/min) was

introduced on the catalyst to start the reaction. The productive gas was on-line analyzed by the gas chromatography. The acetylene conversion and the ethylene selectivity were calculated as following:

$$\text{acetylene conversion} = \frac{[\text{C}_2\text{H}_2]_{\text{inlet}} - [\text{C}_2\text{H}_2]_{\text{outlet}}}{[\text{C}_2\text{H}_2]_{\text{inlet}}} \times 100\% \quad (5)$$

$$\text{ethylene selectivity} = \frac{[\text{C}_2\text{H}_2]_{\text{inlet}} - [\text{C}_2\text{H}_2]_{\text{outlet}} - [\text{C}_2\text{H}_6]_{\text{outlet}}}{[\text{C}_2\text{H}_2]_{\text{inlet}} - [\text{C}_2\text{H}_2]_{\text{outlet}}} \times 100\% \quad (6)$$

The hydrogenation of nitrobenzene and 1-nitronaphthalene were performed on an autoclave equipped with a magnetic stirrer and a heating jacket. Typically, 1.3 mmol of the reaction substrate was mixed with 7.5 g of ethanol and 13 mg of catalyst within the autoclave. The autoclave was purged with 3 MPa of H<sub>2</sub> for 5 times and charged with 1 MPa of H<sub>2</sub>. Afterwards, the autoclave was heated to 50 °C and maintained at this temperature for desired reaction time. After the reaction, the catalyst was separated by centrifugation and the products were analyzed on a gas chromatography equipped a flame-ionization detector (FID). The average reaction rates values were calculated as follows:

$$\text{Average reaction rates} = \frac{n_{\text{reactant, converted}}}{n_{\text{pd}} \times \text{reaction time}} \quad (7)$$

### Catalyst Characterization

X-Ray Diffraction (XRD) patterns were obtained using a Rigaku XRD-6000 diffractometer with Cu K<sub>α</sub> radiation source ( $\lambda = 1.5418 \text{ \AA}$ ) operating at 40 kV and 30 mA. Transmission electron microscopy (TEM) images, scanning transmission electron microscopy (STEM) images, and element energy-dispersive spectroscopy (EDS) mappings were acquired using a JEOL JEM-3100F electron microscope with an acceleration voltage of 300 kV. Raman spectra were collected on a HORIBA JobinYvon spectrometer from 500 to 2500 nm. CO chemisorption and temperature-programmed desorption of H<sub>2</sub>, acetylene, or ethylene (H<sub>2</sub>, C<sub>2</sub>H<sub>2</sub>, C<sub>2</sub>H<sub>4</sub>-TPD) experiments were measured with a Micromeritics Chemi-Sorb 2920 instrument equipped with a thermal conductivity detector (TCD). For CO chemisorption, 100 mg of catalyst (40-60 mesh) was placed in a quartz tube, pretreated in flowing He (25 mL min<sup>-1</sup>) at 400 °C for 30

min. After cooled to 50 °C, 10% CO/Ar was pulse introduced on the catalysts until saturation adsorption. The Pd dispersion was calculated by CO adsorbed amount/Pd loading amount. Temperature programmed desorption (TPD) experiments were performed under the same pretreatment conditions, after cooled to 30 °C, H<sub>2</sub>, C<sub>2</sub>H<sub>2</sub>, or C<sub>2</sub>H<sub>4</sub> was introduced on the catalyst. After adsorbing for 1 h, the physisorbed H<sub>2</sub>, C<sub>2</sub>H<sub>2</sub>, or C<sub>2</sub>H<sub>4</sub> was swept by flowing Ar for 1 h. Then the catalyst was temperature-programmed-heated (10 °C/min) to 500 °C. X-ray photoelectron spectroscopy (XPS) was recorded by a Quantum 2000 Scanning ESCA Microprobe. Fourier transform-infrared spectroscopy (FT-IR) spectra were recorded on a VERTEX 70 BRUKER spectrometer equipped with a *in situ* cell and a MCT detector. Prior to testing, all samples were subjected to vacuum-treated at 200 °C for 1 h.

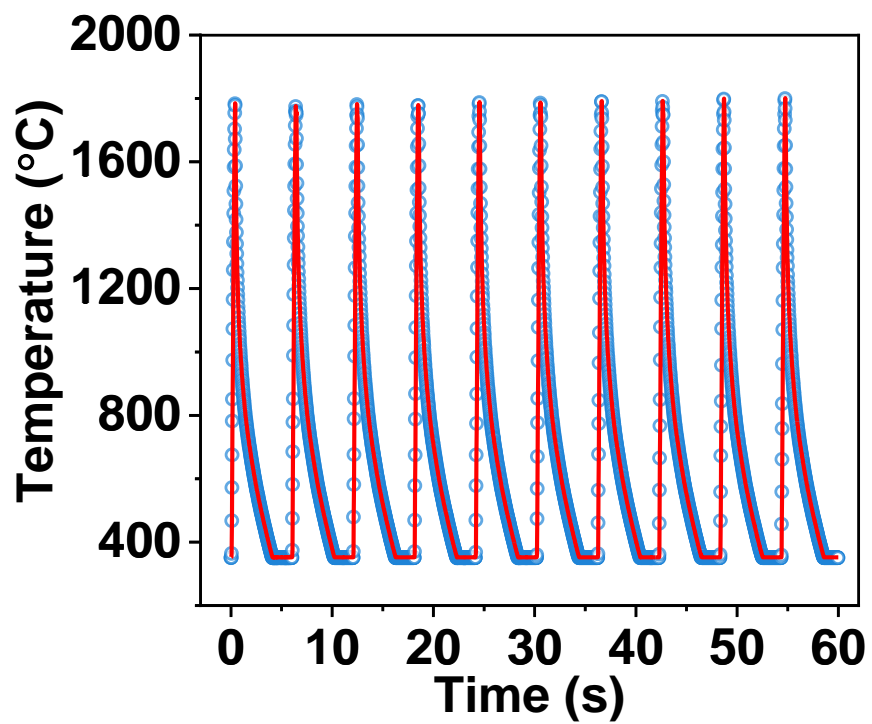

Fig. S1 Temperature as a function of time during the high-temperature pulse.

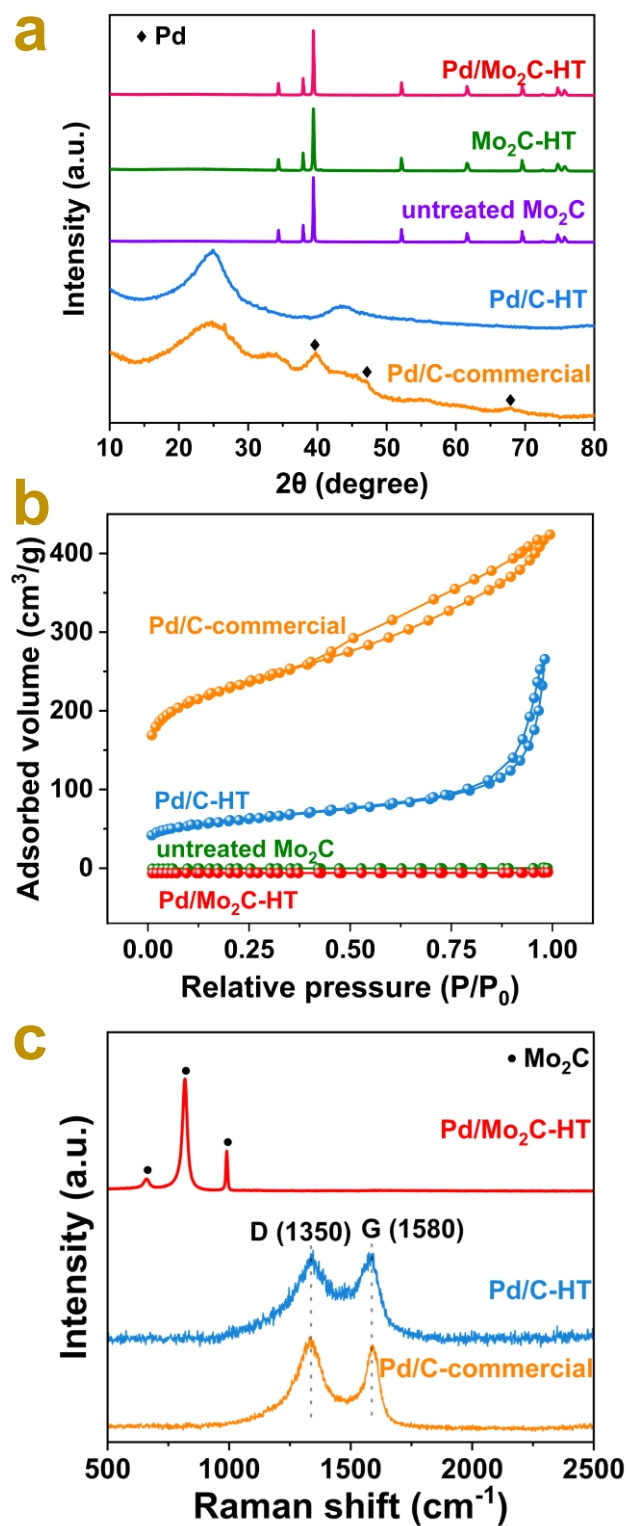

**Fig. S2** (a) XRD patterns of the Pd/Mo<sub>2</sub>C-HT, Mo<sub>2</sub>C-HT, Pd/C-HT, and Pd/C-commercial samples; (b) N<sub>2</sub>-sorption isotherms of the untreated Mo<sub>2</sub>C, Pd/Mo<sub>2</sub>C-HT, Pd/C-commercial, and Pd/C-HT samples; (c) Raman spectra of the Pd/Mo<sub>2</sub>C-HT, Pd/C-HT, and Pd/C-commercial catalysts.

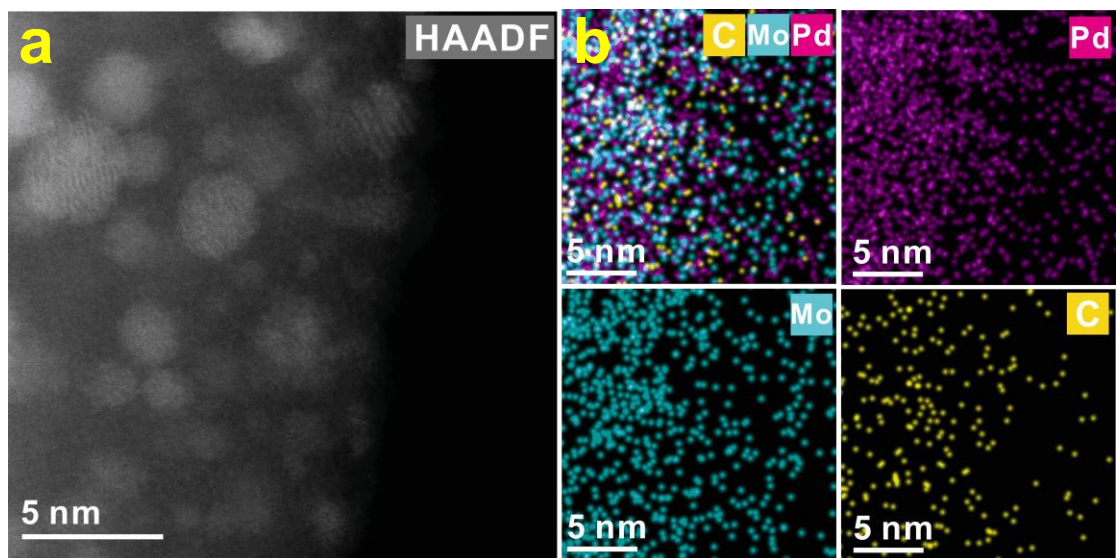

**Fig. S3** (a) HAADF-STEM image and (b) corresponding elemental mapping of the Pd/Mo<sub>2</sub>C-HT sample.



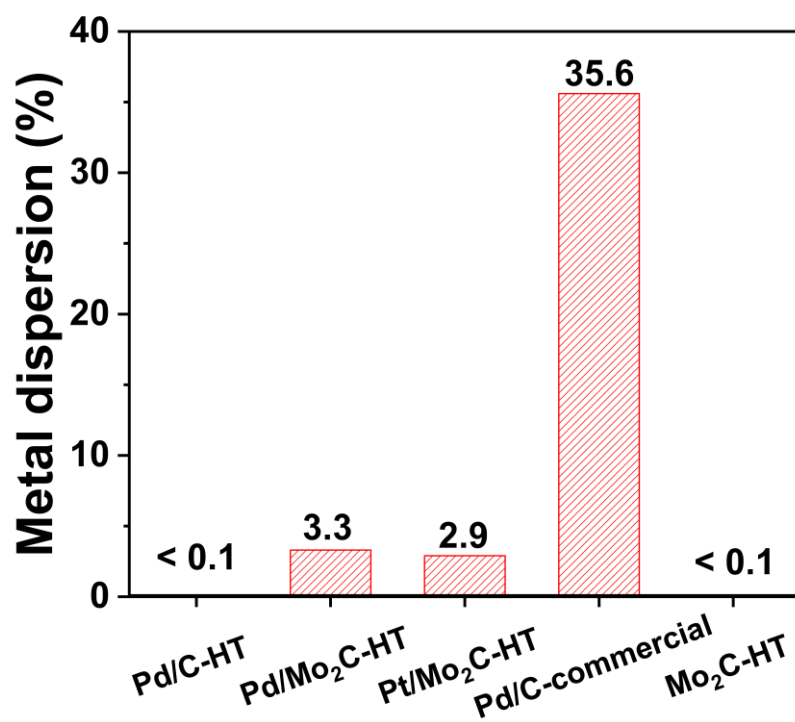

**Fig. S4** Pd dispersion values of the Pd/C-HT, Pd/C-commercial, Pd/Mo<sub>2</sub>C-HT, Pt/Mo<sub>2</sub>C-HT, and Mo<sub>2</sub>C-HT samples.

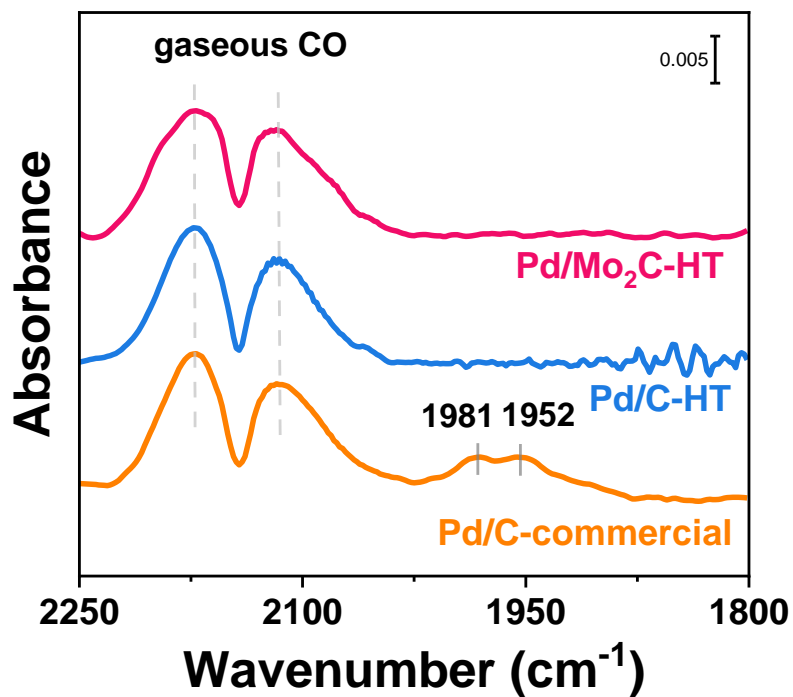

**Fig. S5** In situ CO-adsorption FT-IR spectra of Pd/Mo<sub>2</sub>C-HT, Pd/C-HT and Pd/C-commercial. Pretreatment conditions of catalysts: N<sub>2</sub>, 200 mL/min, 200 °C, 1 h; CO adsorption conditions: 0.5% CO/N<sub>2</sub>, 100 mL/min, 30 °C.

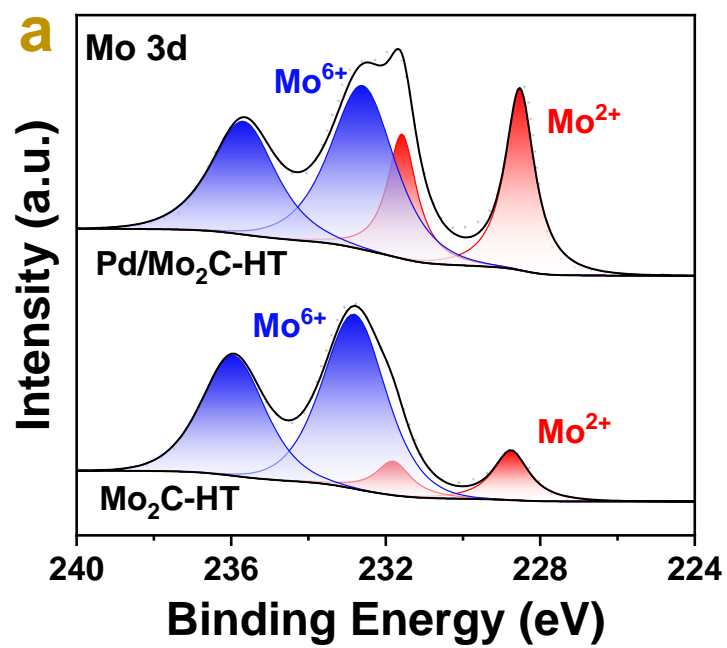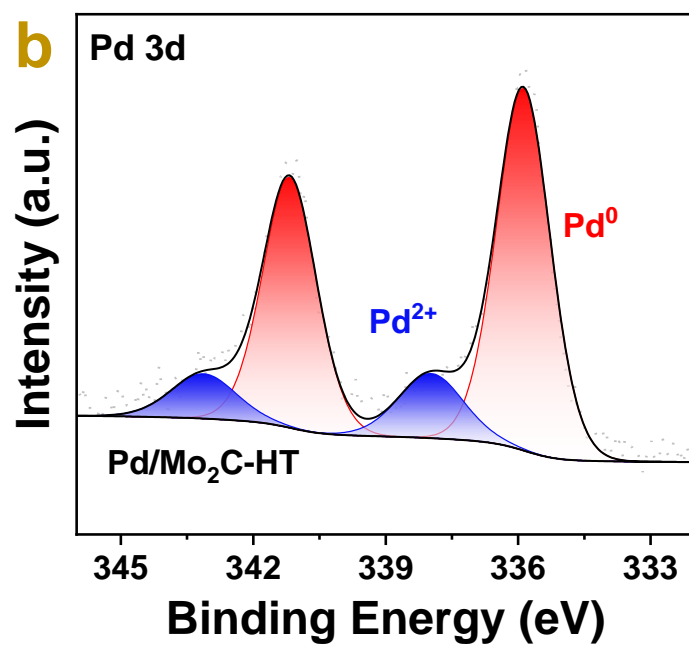

**Fig. S6** (a) Mo3d XPS spectra of the Pd/Mo<sub>2</sub>C-HT and Mo<sub>2</sub>C-HT samples; (b) Pd3d XPS spectrum of the Pd/Mo<sub>2</sub>C-HT samples.

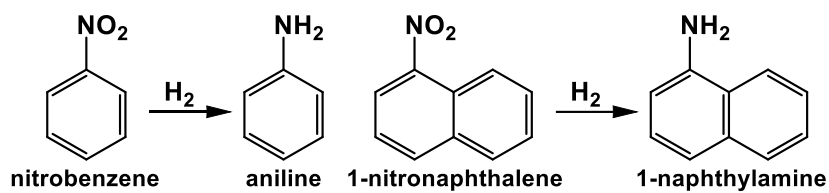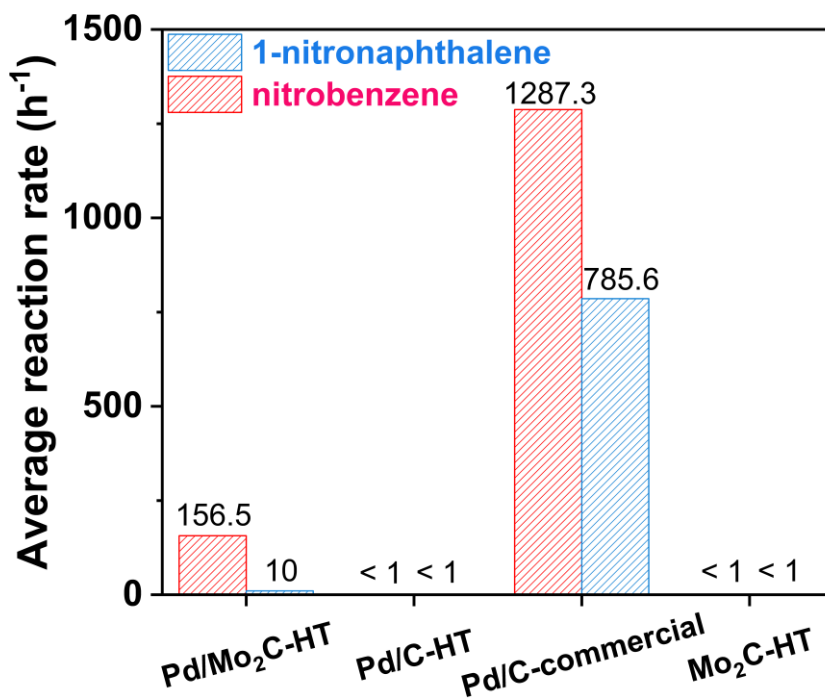

**Fig. S7** Reaction rates in the hydrogenation of nitrobenzene and 1-nitronaphthalene over the Pd/C-HT, Pd/C-commercial, Pd/Mo<sub>2</sub>C-HT, and Mo<sub>2</sub>C-HT catalysts. Reaction conditions: 1.3 mmol of nitrobenzene or 1-nitronaphthalene, 13 mg of catalyst, 7.5 g of ethanol, 1 MPa of H<sub>2</sub>, and 50 °C, 1 h.

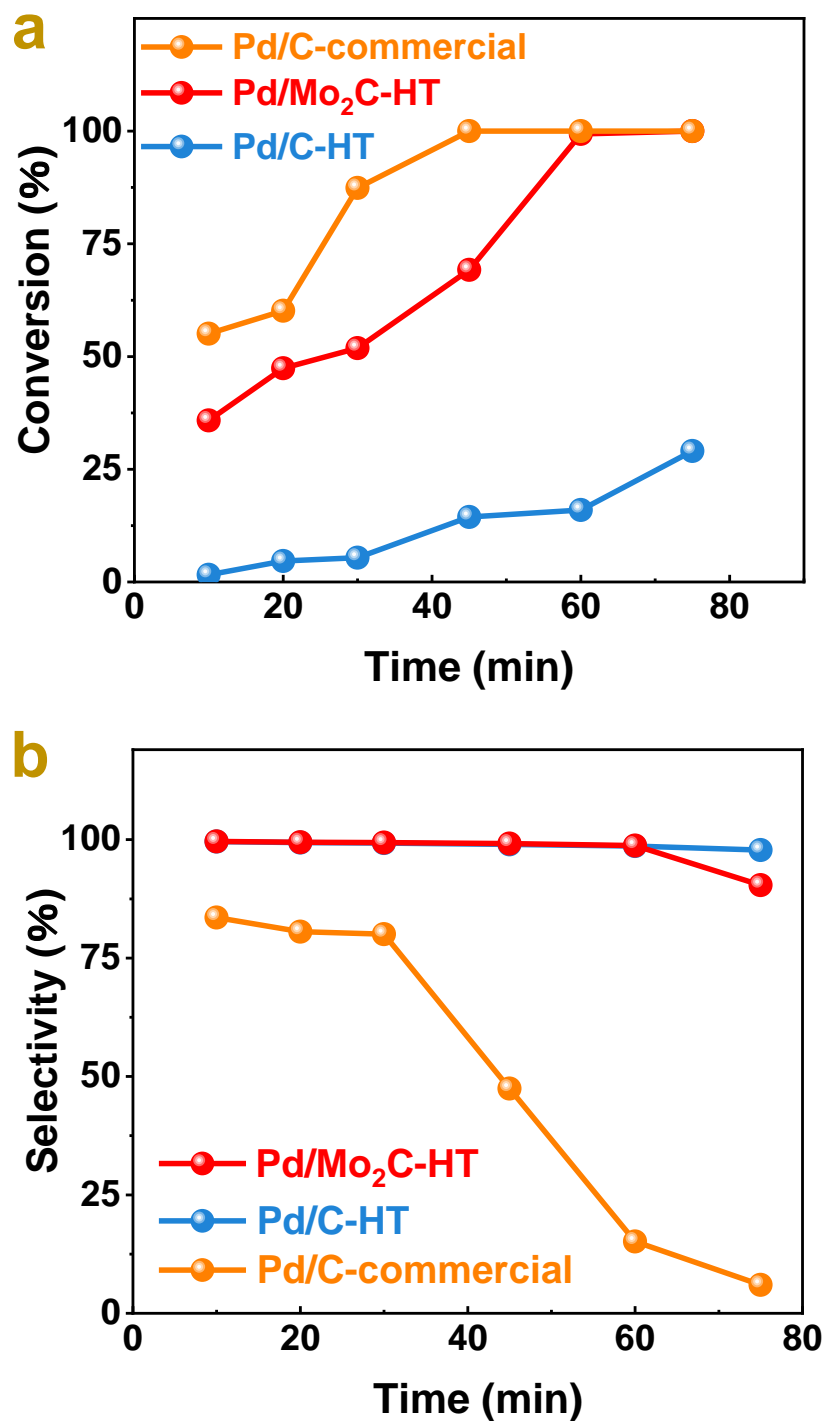

**Fig. S8** (a) 3-Butyn-1-ol conversion and (b) selectivity to 3-buten-1-ol as a function of reaction time in the hydrogenation of 3-butyn-1-ol to 3-buten-1-ol over the Pd/C-HT, Pd/C-commercial, Pd/Mo<sub>2</sub>C-HT catalysts. Reaction conditions: 1.75 g of 3-butyn-1-ol, 100 mg of catalyst, 30 g of ethanol, 40 °C, 1 MPa of H<sub>2</sub>.

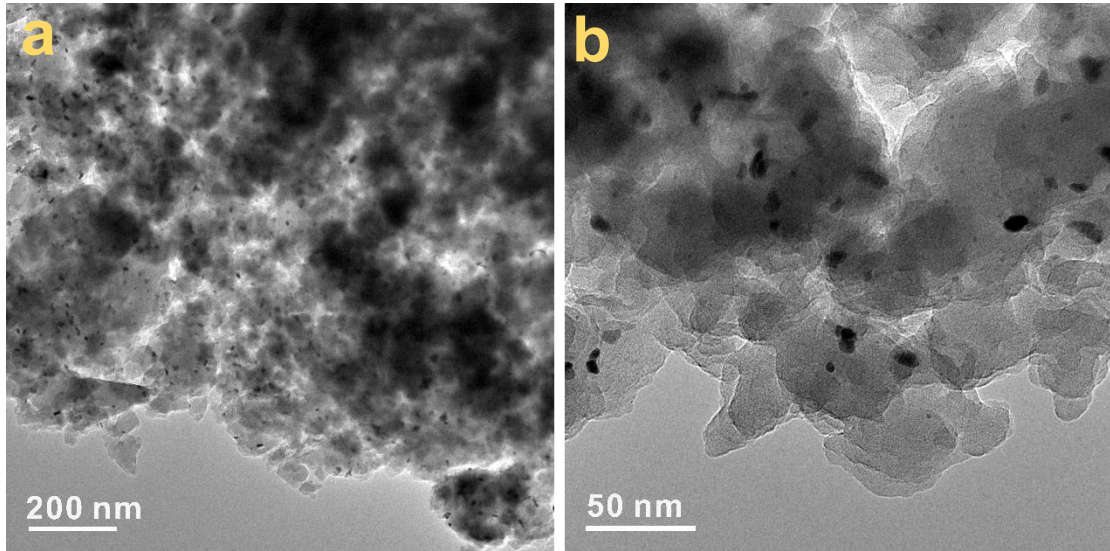

**Fig. S9** (a and b) TEM images of the Pd/Al<sub>2</sub>O<sub>3</sub>-commercial sample.

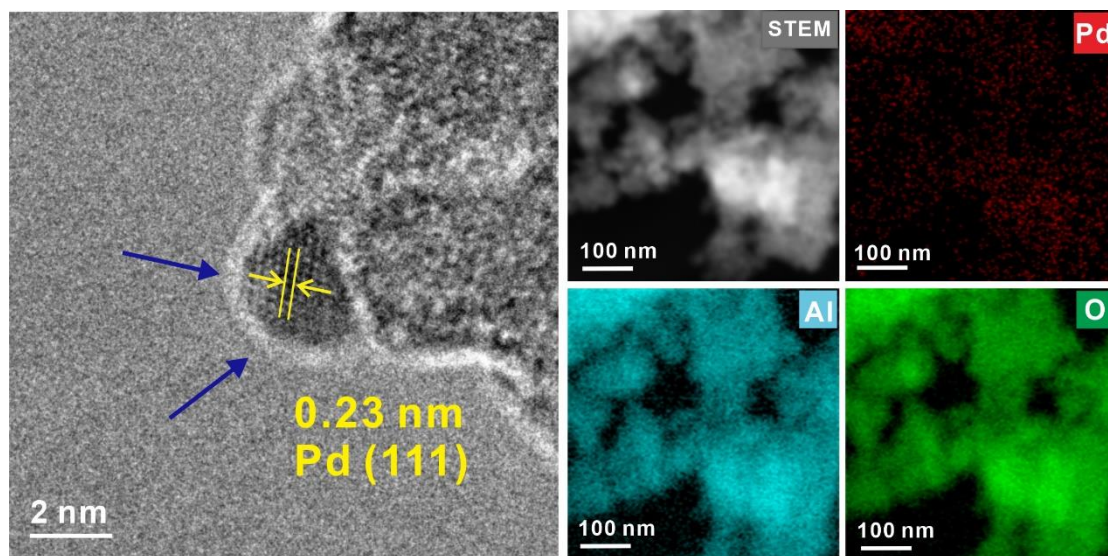

**Fig. S10** (a) TEM image, (b) STEM image, and corresponding elemental mapping of the Pd/Al<sub>2</sub>O<sub>3</sub>-HT sample.

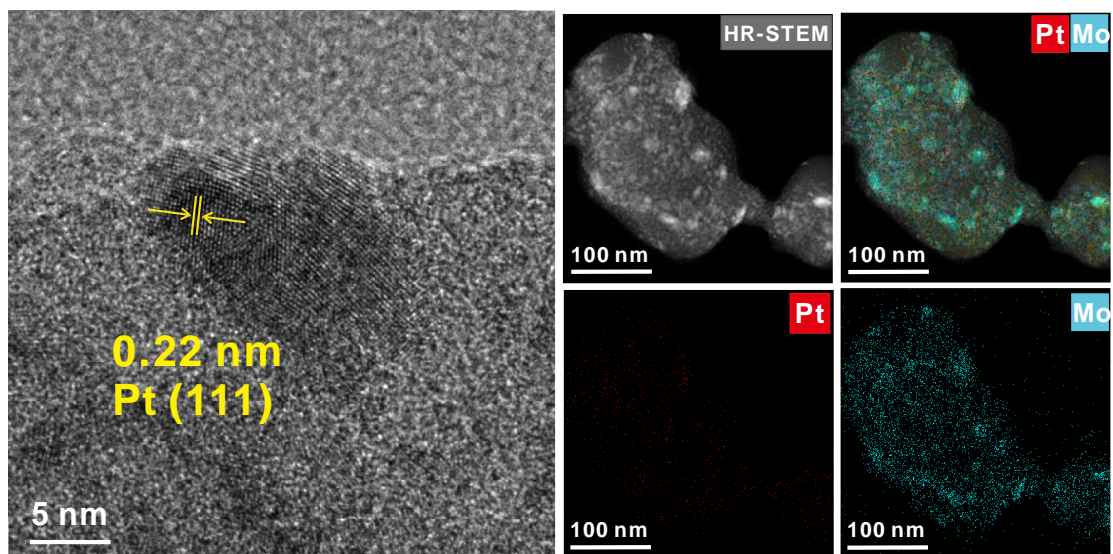

**Fig. S11** (a) TEM image, (b) HR-STEM image and the corresponding elemental mapping of the Pt/Mo<sub>2</sub>C-HT sample.

**Note:** We have also synthesized Mo<sub>2</sub>C supported Pt catalyst (designated as Pt/Mo<sub>2</sub>C-HT) through the high-temperature pulse method (Fig. S11), which also possessed comparable embedded Pt nanoparticle (Fig. S4) and charge transfer from Mo<sub>2</sub>C to Pt as the Pd/Mo<sub>2</sub>C-HT catalyst (Fig. S12).



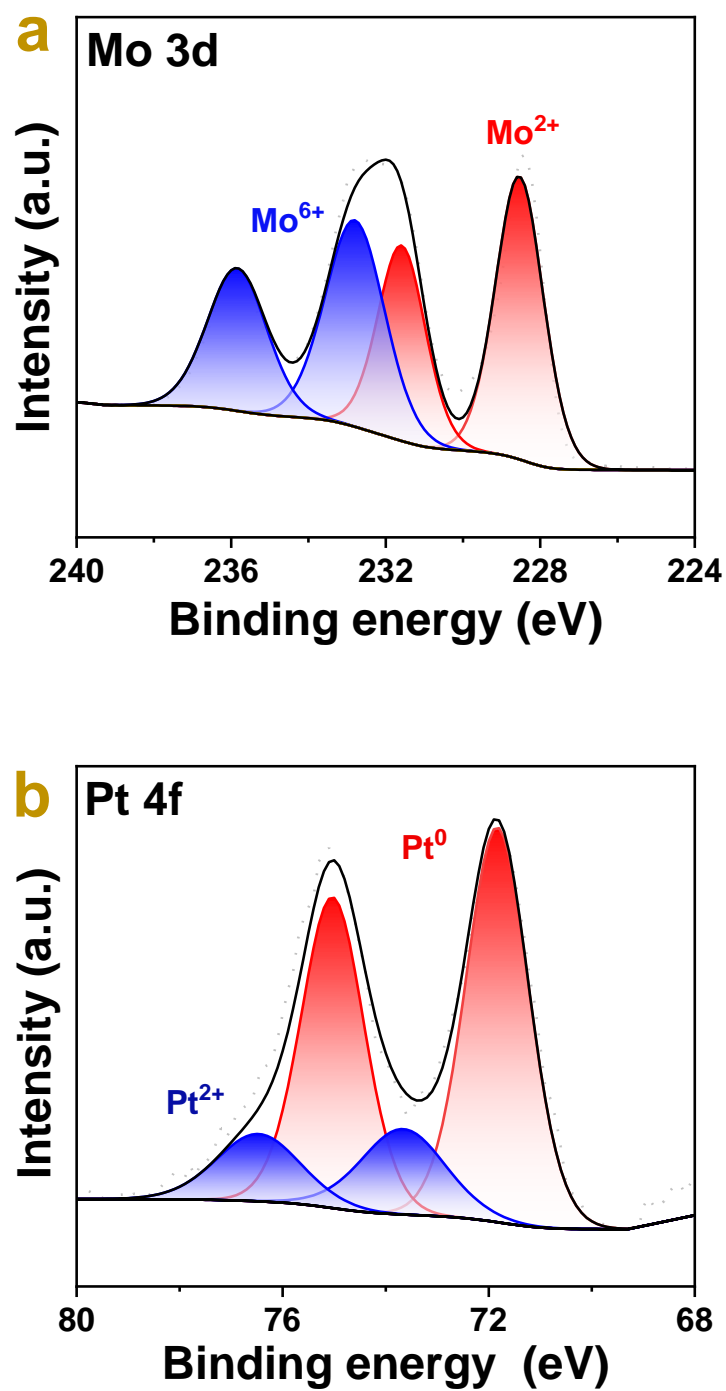

Fig. S12 (a) Mo3d and (b) Pt4f XPS spectrum of the Pt/Mo<sub>2</sub>C-HT samples.

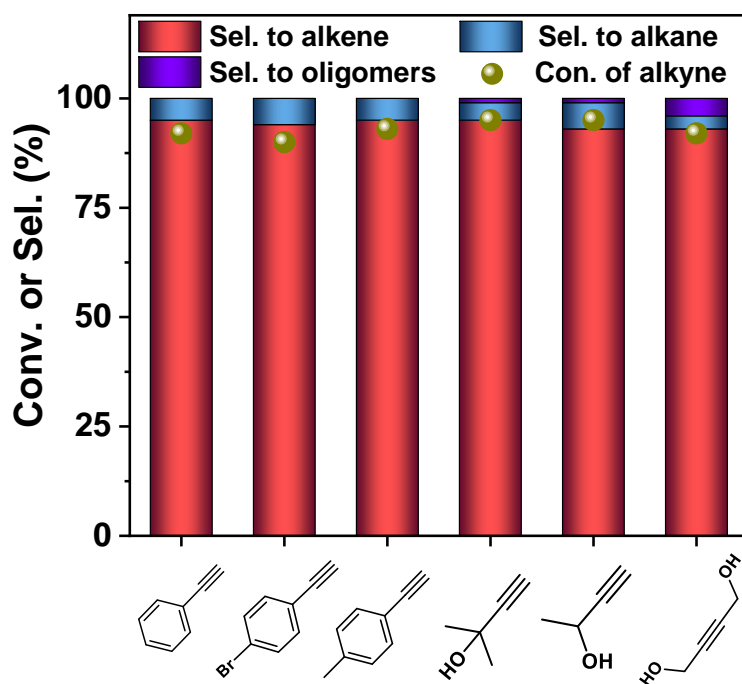

**Fig. S13** Alkyne conversions and selectivities to the corresponding alkenes over the Pd/Al<sub>2</sub>O<sub>3</sub>-HT catalyst in the semi-hydrogenation of phenylacetylene, 4-bromophenylacetylene, 4-methylphenylacetylene, 2-methylbut-3-yn-2-ol, 3-butyn-2-ol, and but-2-yne-1,4-diol. Reaction conditions: 1.22 g of phenylacetylene, 24.8 mg of catalyst, 30 g of ethanol, 25 °C, 1 MPa of H<sub>2</sub>, and 22 min; 1.03 g of 4-bromophenylacetylene, 51.3 mg of catalyst, 30 g of ethanol, 25 °C, 1 MPa of H<sub>2</sub>, and 45 min; 1.41 g of 4-methylphenylacetylene, 27.1 mg of catalyst, 30 g of ethanol, 25 °C, 1 MPa of H<sub>2</sub>, and 20 min; 0.86 g of 2-methyl-3-butyn-2-ol, 25.2 mg of catalyst, 30 g of ethanol, 25 °C, 1 MPa of H<sub>2</sub>, and 46 min; 0.85 g of 3-butyn-2-ol, 25.0 mg of catalyst, 30 g of ethanol, 25 °C, 1 MPa of H<sub>2</sub>, and 36 min, 1.04 g of but-2-yne-1,4-diol, 26.4 mg of catalyst, 30 g of ethanol, 25 °C, 1 MPa H<sub>2</sub>, and 59 min.

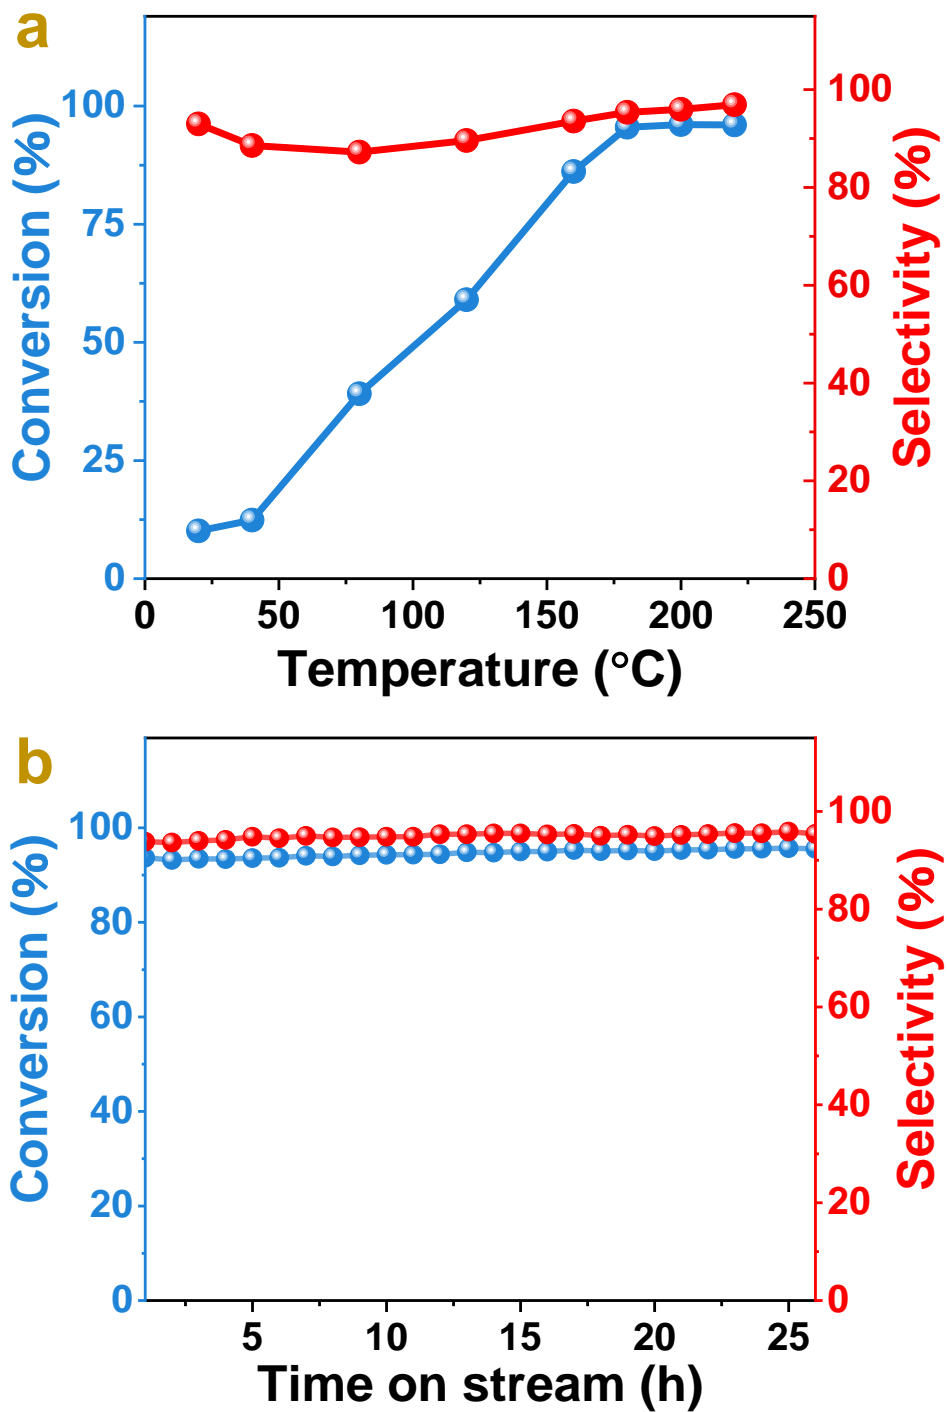

**Fig. S14** Acetylene conversion and ethene selectivity as a function of reaction (a) temperature and (b) time in the hydrogenation of acetylene to ethene over the Pd/Mo<sub>2</sub>C-HT catalyst. Reaction conditions: 1% C<sub>2</sub>H<sub>2</sub> / 20% C<sub>2</sub>H<sub>4</sub> / 20% H<sub>2</sub> / 59%N<sub>2</sub>, 60 mL/min, 300 mg of catalyst.

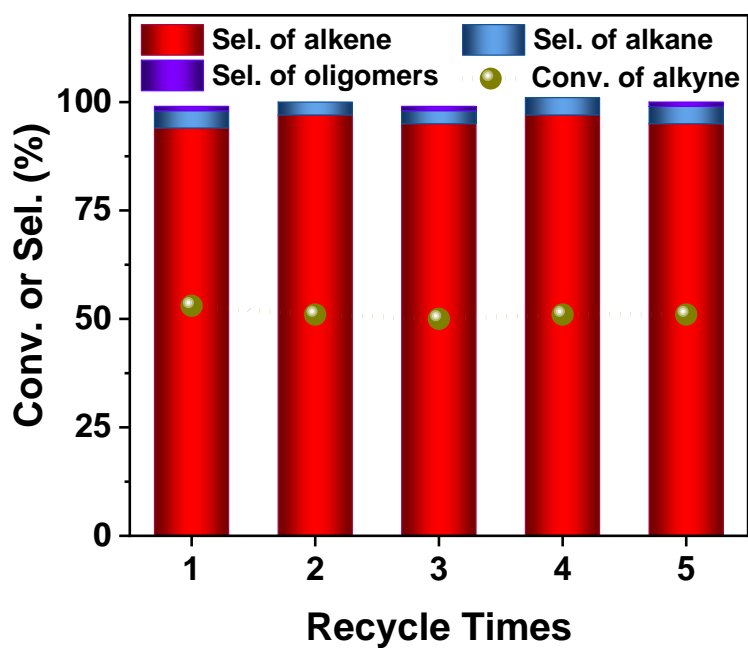

**Fig. S15** Catalytic stability of Pd/Al<sub>2</sub>O<sub>3</sub>-HT in the semi-hydrogenation of 2-methylbut-3-yn-2-ol. Reaction conditions: 5.0 mg of Pd/Al<sub>2</sub>O<sub>3</sub>-HT, 0.3000 g of MBY, 5 mL of ethanol, 25 °C, 1 MPa of H<sub>2</sub>, 10 min.

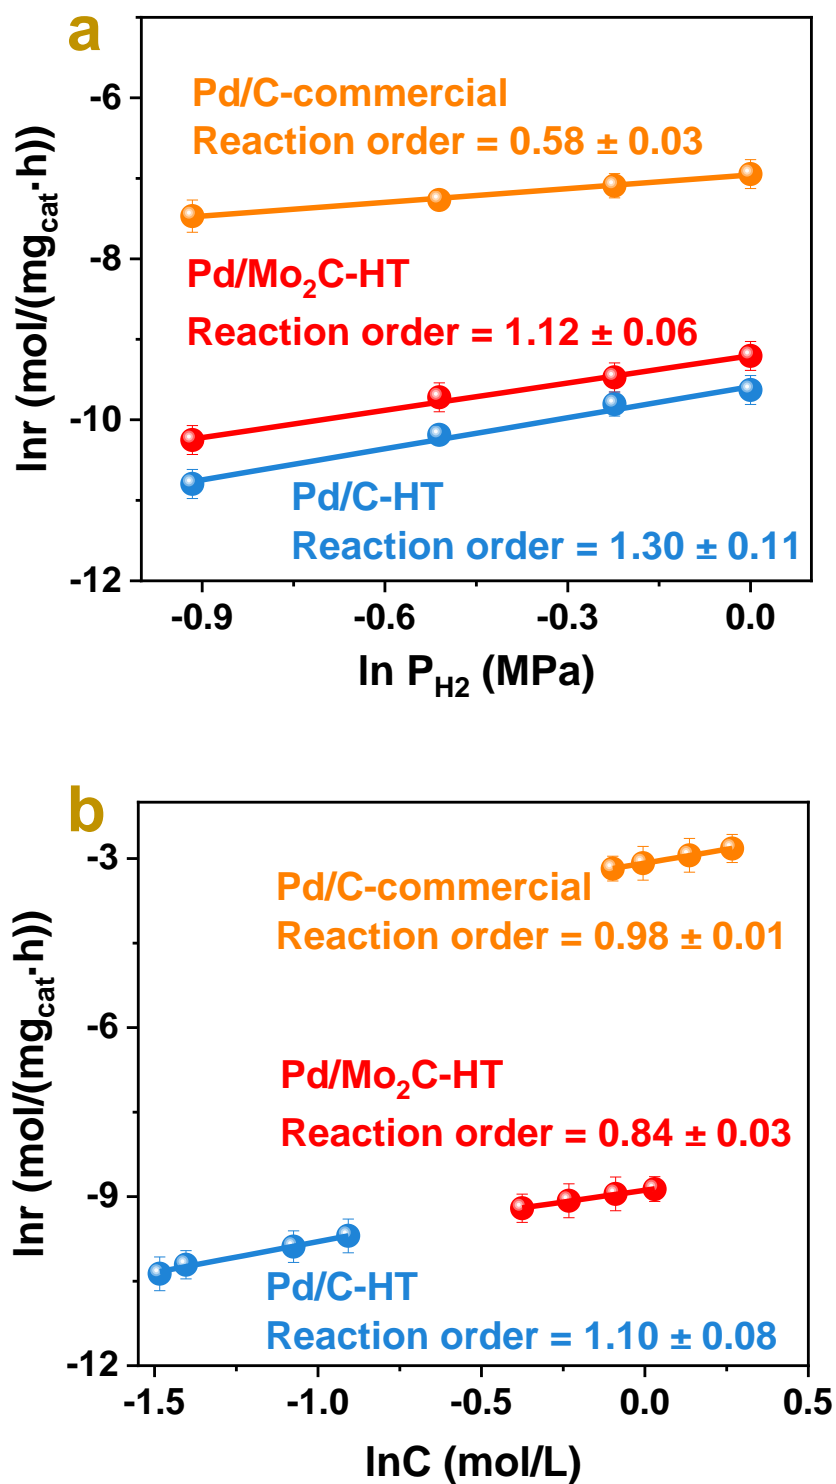

**Fig. S16** Data characterizing the reaction order of (a) H<sub>2</sub> and (b) 3-butyne-1-ol in the hydrogenation of 3-butyne-1-ol to 3-buten-1-ol over the Pd/Mo<sub>2</sub>C-HT, Pd/C-HT, and Pd/C-commercial catalysts.

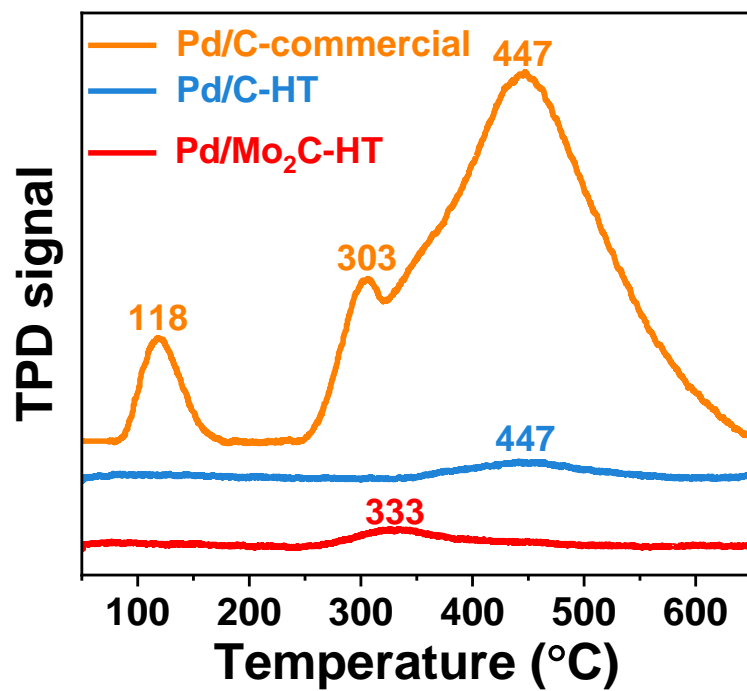

Fig. S17 H<sub>2</sub>-TPD profiles of the Pd/Mo<sub>2</sub>C-HT, Pd/C-HT, and Pd/C-commercial catalysts.

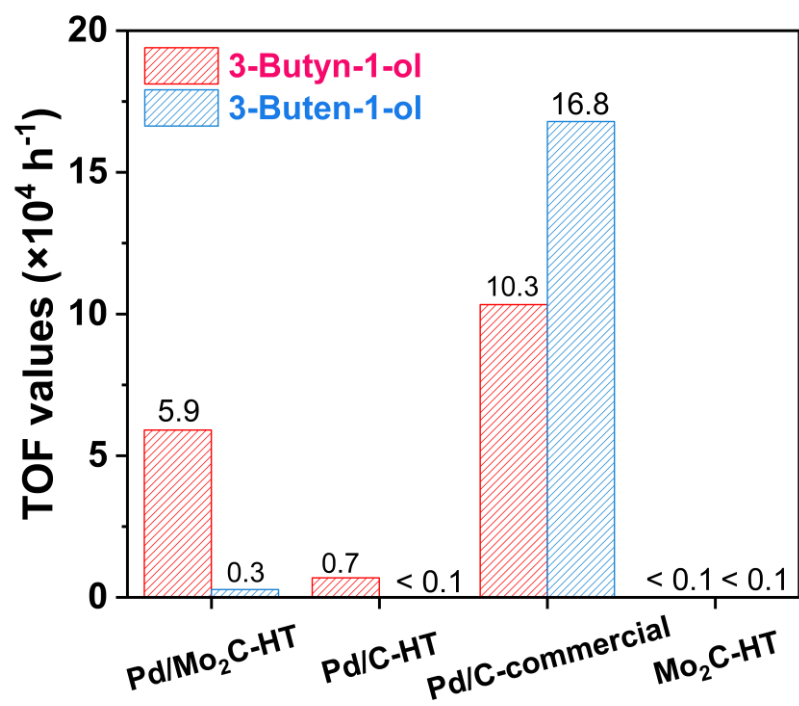

**Fig. S18** TOF values in the hydrogenation of 3-butyn-1-ol and 3-buten-1-ol over the Pd/C-HT, Pd/C-commercial, Mo<sub>2</sub>C-HT, and Pd/Mo<sub>2</sub>C-HT catalysts.

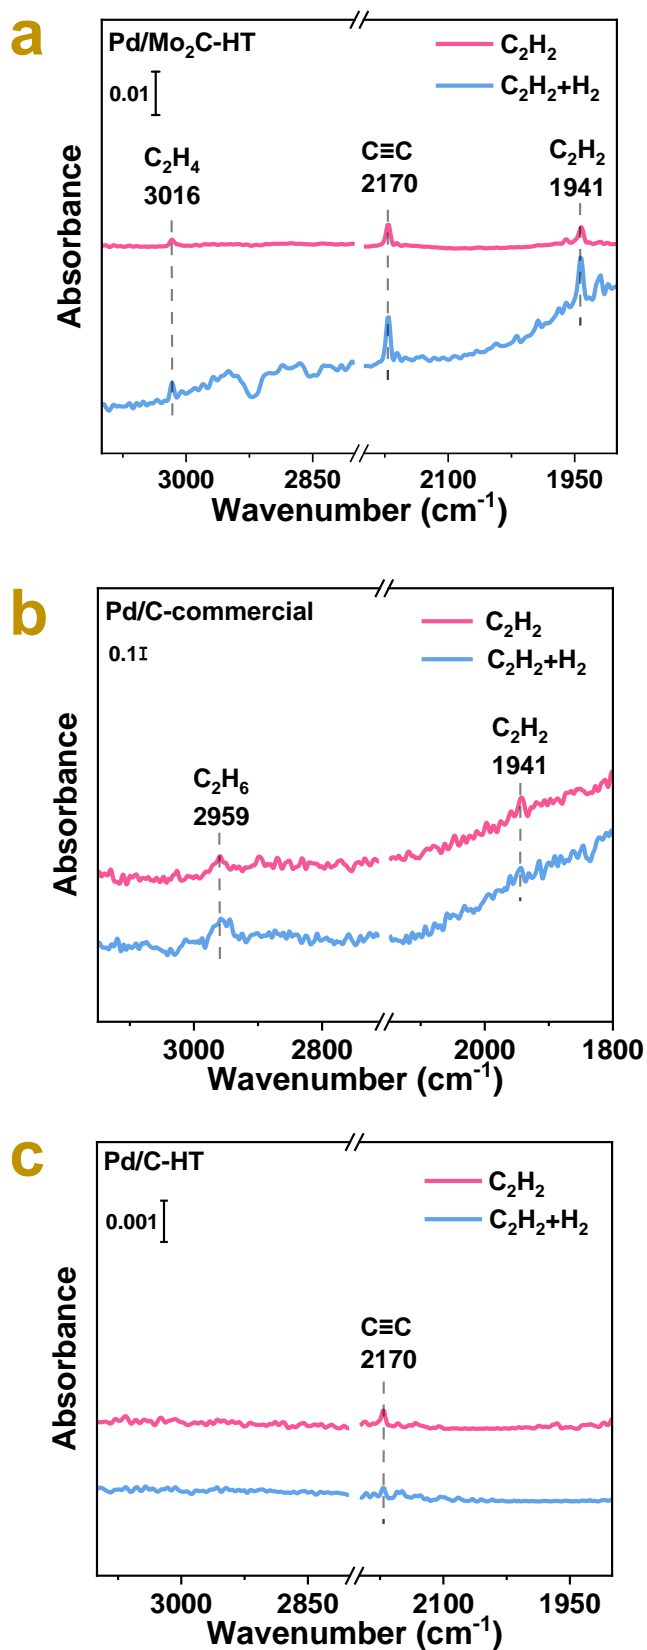

**Fig. S19** *In situ* FT-IR spectra during the treatment of the (a) Pd/Mo<sub>2</sub>C-HT, (b) Pd/C-commercial, and (c) Pd/C-HT catalysts with C<sub>2</sub>H<sub>2</sub> or C<sub>2</sub>H<sub>2</sub> + H<sub>2</sub>.



**Table S1.** Textual structure of Pd/C-commercial, Pd/C-HT, Pd/Mo<sub>2</sub>C-HT, and Mo<sub>2</sub>C samples.

| Sample                      | $S_{\text{BET}}$ (m <sup>2</sup> /g) <sup>a</sup> | $V_{\text{p}}$ (cm <sup>3</sup> /g) <sup>b</sup> |
|-----------------------------|---------------------------------------------------|--------------------------------------------------|
| Pd/Mo <sub>2</sub> C-HT     | <5                                                | < 0.1                                            |
| untreated Mo <sub>2</sub> C | <5                                                | < 0.1                                            |
| Pd/C-HT                     | 215.8                                             | 0.41                                             |
| Pd/C-commercial             | 841.4                                             | 0.65                                             |

<sup>a</sup> Calculated by using the BET method.

<sup>b</sup> Single point total pore volume at  $P/P_0 = 0.997$ .
